# Supplementary material for: Stakeholder Engagement to Identify Priorities for Improving the Quality and Value of Critical Care
Source: PubMed Central journal article supplement (PMC4619641; doi:10.1371/journal.pone.0140141), 2015-10-22
Supplement: pone.0140141.s002.pdf [file pone.0140141.s002.pdf]

**S2 Appendix. Critical Care Network Core Committee Ratings of Priorities for Improvement**

| Priorities for Quality Improvement                                      | Median Score on 9 Point Scale                        |         |
|-------------------------------------------------------------------------|------------------------------------------------------|---------|
|                                                                         | Round 1                                              | Round 2 |
|                                                                         | Transition of patient care from ICU to hospital ward | 8       |
| Early mobilization                                                      | 8                                                    | 8       |
| Delirium screening & diagnosis                                          | 8                                                    | 7       |
| Transition of patient care between providers within ICU                 | 8                                                    | 7       |
| Establishing daily goals for patient care                               | 8                                                    | 7       |
| End-of-life care                                                        | 7.5                                                  | 7       |
| Daily sedation interruption                                             | 7.5                                                  | 7       |
| Duration of empiric antimicrobial prescriptions                         | 7                                                    | 7       |
| Patient and family participation in daily rounds                        | 7                                                    | 7       |
| Strategies to facilitate patient day/night cycle                        | 7                                                    | 7       |
| Temperature control in patients after resuscitation from cardiac arrest | 7                                                    | 7       |
| Routine blood tests                                                     | 7.5                                                  | 6.5     |
| Strategies to preserve patient sleep                                    | 7                                                    | 6.5     |

|                                                                                              |     |     |
|----------------------------------------------------------------------------------------------|-----|-----|
| Physical and pharmacological restraints                                                      | 7   | 6.5 |
| Matching available human resources to patient needs                                          | 7.5 | 6   |
| Limiting blood transfusion in non-bleeding patients                                          | 7   | 6   |
| Prescription of empiric broad spectrum antimicrobials                                        | 7   | 6   |
| Establishing goals of care at time of patient admission to ICU                               | 7   | 6   |
| Reviewing goals of care at time of patient discharge from ICU                                | 7   | 6   |
| Routine diagnostic imaging studies                                                           | 8   | 5.5 |
| Venous thromboembolism prophylaxis                                                           | 7.5 | 5   |
| Placing patients with acute respiratory distress syndrome in prone position                  | 7   | 5   |
| Fluid resuscitation with albumin                                                             | 7   | 5   |
| Protocols to guide liberation from mechanical ventilation                                    | 7   | 5   |
| Patient care rounds that are multidisciplinary                                               | 7   | 5   |
| Frequency of communication with patient/family                                               | 7   | 5   |
| Lung protective ventilation strategies for patients with acute respiratory distress syndrome | 6   | 5   |
| Bronchoscopy to evaluate ventilator associated pneumonia                                     | 6   | 5   |

|                                                                                                   |     |     |
|---------------------------------------------------------------------------------------------------|-----|-----|
| Request for tissue/organ donation from families of deceased patients                              | 6   | 5   |
| Skin hygiene to prevent pressure ulcers                                                           | 6   | 5   |
| Post-operative monitoring of elective surgical patients                                           | 6   | 5   |
| Facilitating full scope of practice for all ICU providers                                         | 5.5 | 5   |
| Providing enteral nutrition                                                                       | 5   | 5   |
| Precautionary isolation of patients pending screening results for multidrug resistant organisms   | 5   | 5   |
| Prescriptions of inhaled Nitric Oxide for hypoxemic respiratory failure                           | 8   | 4.5 |
| Reporting adverse drug events                                                                     | 7.5 | 4.5 |
| Medication reconciliation                                                                         | 7   | 4.5 |
| Ventilation with high frequency oscillation for patients with acute respiratory distress syndrome | 7   | 4.5 |
| Using ultrasound to guide central venous catheter insertion                                       | 7   | 4.5 |
| Strategies to prevent ventilator associated pneumonia                                             | 7   | 4.5 |
| Serial CT scans of the head for brain injured patients                                            | 6   | 4.5 |
| Non-invasive hemodynamic monitoring                                                               | 5.5 | 4.5 |
| Stepping medications from intravenous to oral route                                               | 7   | 4   |

|                                                                                                                     |     |     |
|---------------------------------------------------------------------------------------------------------------------|-----|-----|
| Duration of central venous catheter                                                                                 | 6.5 | 4   |
| Patient care rounds that are standardized in structure & process                                                    | 6   | 4   |
| Monitoring patient radiation exposure from diagnostic studies/procedures                                            | 6   | 4   |
| Type of dialysis prescribed (i.e., continuous renal replacement therapy vs. intermittent renal replacement therapy) | 5   | 4   |
| Oral hygiene (e.g., brushing teeth)                                                                                 | 7   | 3.5 |
| Frequency of central venous catheter insertion                                                                      | 5.5 | 3.5 |
| Protocols to manage sepsis                                                                                          | 7   | 3   |
| Stress ulcer prophylaxis                                                                                            | 6   | 3   |
| Routine prescription of bronchodilators for patients mechanically ventilated                                        | 6   | 3   |
| CT scans of the head for patients "not waking up"                                                                   | 5   | 3   |
| Chest physiotherapy for patients with respiratory failure                                                           | 5   | 3   |
| Frequency of invasive hemodynamic monitoring (i.e. arterial catheters)                                              | 5   | 3   |
| Using insulin to provide tight glycemic control                                                                     | 5   | 3   |
| Non-invasive ventilation for patients with respiratory failure                                                      | 5   | 3   |
| Providing total parenteral nutrition                                                                                | 5   | 3   |

|                                                                    |     |   |
|--------------------------------------------------------------------|-----|---|
| Patient hygiene (e.g., bathing)                                    | 6.5 | 2 |
| Selective decontamination of the digestive tract to prevent sepsis | 5   | 2 |
| Frequency of therapeutic drug monitoring (e.g., phenytoin levels)  | 5   | 2 |
| Duration of prescriptions for progastric motility medications      | 5   | 2 |
| Surveillance blood cultures                                        | 5   | 2 |
| Requests for subspecialty consultation                             | 5   | 2 |
| Flushing invasive catheters with heparin                           | 5   | 2 |
| Fluid resuscitation with hydroxyethyl starch solutions             | 5.5 | 1 |
| Prescribing acetaminophen using weight-based doses                 | 5   | 1 |
| Modified barium swallow to assess swallowing post-extubation       | 3   | 1 |
