# Supplementary material for: Stakeholder Engagement to Identify Priorities for Improving the Quality and Value of Critical Care
Source: PubMed Central journal article supplement (PMC4619641; doi:10.1371/journal.pone.0140141), 2015-10-22

### S3 Appendix. Histograms of Provider Ratings of Priorities for Improvement

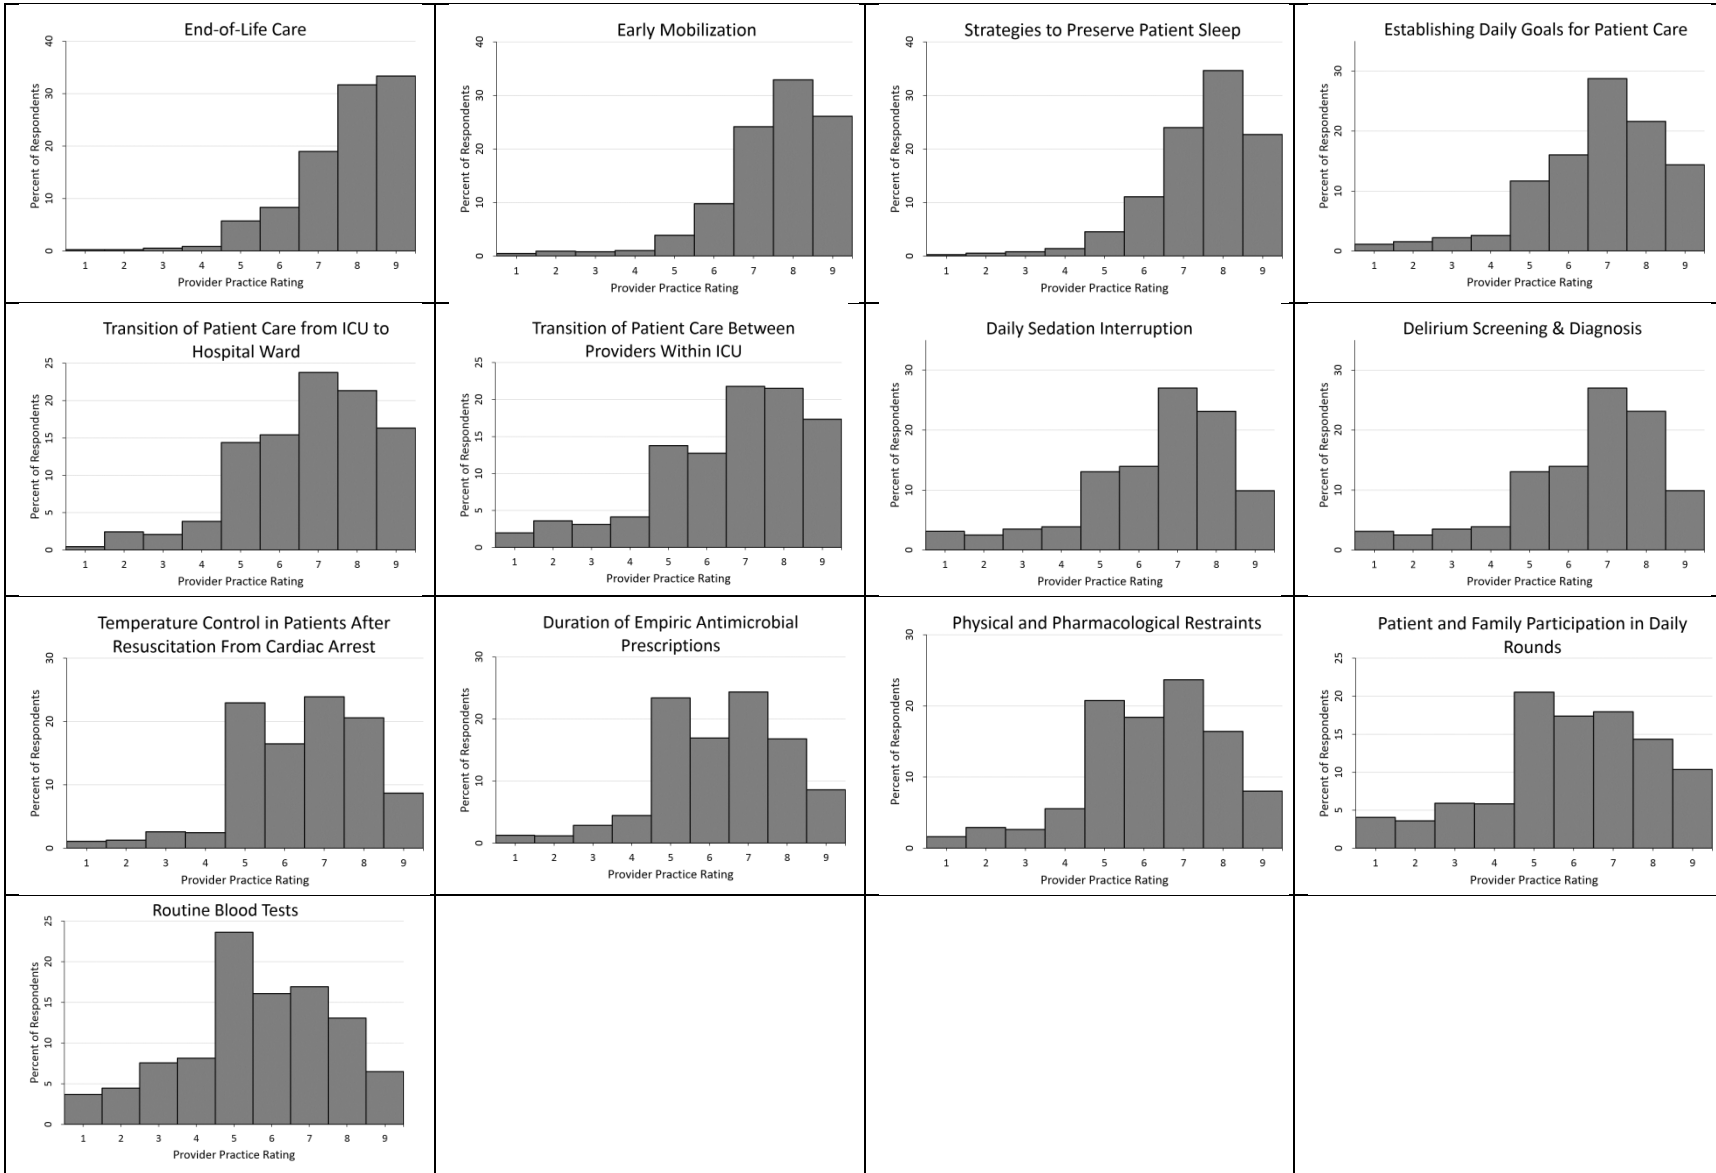

Supplement: pone.0140141.s003.pdf [file pone.0140141.s003.pdf]
