# Supplementary material for: Stakeholder Engagement to Identify Priorities for Improving the Quality and Value of Critical Care
Source: PubMed Central journal article supplement (PMC4619641; doi:10.1371/journal.pone.0140141), 2015-10-22
Supplement: pone.0140141.s004.pdf [file pone.0140141.s004.pdf]

## **S4 Appendix. Additional Priorities Proposed by Providers for Quality Improvement\***

### **Priorities Proposed by Providers**

### **Providers**

**(n=136)**

#### Newly Identified Priorities

|                                                        |   |
|--------------------------------------------------------|---|
| 1. Transition of patient care into ICU                 | 9 |
| 2. Infection control                                   | 6 |
| 3. Family access to support staff                      | 5 |
| 4. Allowing family to be with patient as needed        | 3 |
| 5. Bowel management                                    | 2 |
| 6. Informing patients of post-ICU syndrome             | 2 |
| 7. Delirium management                                 | 1 |
| 8. Family presence during emergency procedures         | 1 |
| 9. Fluid management                                    | 1 |
| 10. Inviting family to be part of care team            | 1 |
| 11. Keeping patient information private                | 1 |
| 12. Management of thirst in ventilated patients        | 1 |
| 13. Patient/family-care team introduction              | 1 |
| 14. Patient transport                                  | 1 |
| 15. Patient's inability to communicate                 | 1 |
| 16. Post-operative care                                | 1 |
| 17. Sedation and analgesia                             | 1 |
| 18. Timely updates for major changes in patient status | 1 |
| 19. Use of invasive procedures                         | 1 |

Priorities Considered but not Selected by Network Committee

|                                                                            |    |
|----------------------------------------------------------------------------|----|
| 1. Establishing goals of care at time of patient admission to ICU          | 12 |
| 2. Multidisciplinary rounds                                                | 7  |
| 3. Providing enteral nutrition                                             | 7  |
| 4. Duration of central venous catheter                                     | 4  |
| 5. Medication reconciliation                                               | 4  |
| 6. Oral hygiene (e.g., brushing teeth)                                     | 3  |
| 7. Protocols to guide liberation from mechanical ventilation               | 3  |
| 8. Skin hygiene to prevent pressure ulcers                                 | 3  |
| 9. Venous thromboembolism prophylaxis                                      | 3  |
| 10. Chest physiotherapy for patients with respiratory failure              | 2  |
| 11. Frequency of communication with patient/family                         | 2  |
| 12. Limiting blood transfusion in non-bleeding patients                    | 2  |
| 13. Non-invasive hemodynamic monitoring                                    | 2  |
| 14. Request for tissue/organ donation for families of deceased patients    | 2  |
| 15. Routine diagnostic imaging studies                                     | 2  |
| 16. Using insulin to provide tight glycemic control                        | 2  |
| 17. Strategies to prevent ventilator associated pneumonia                  | 2  |
| 18. Bronchoscopy to evaluate patients with ventilator associated pneumonia | 1  |
| 19. Fluid resuscitation with albumin                                       | 1  |
| 20. Fluid resuscitation with hydroxyethyl starch solutions                 | 1  |
| 21. Frequency of invasive hemodynamic monitoring (i.e., arterial           | 1  |

catheters)

- |                                                                                                                         |   |
|-------------------------------------------------------------------------------------------------------------------------|---|
| 22. Lung protective ventilation strategies for patients with acute respiratory distress syndrome                        | 1 |
| 23. Matching available human resources to patient needs                                                                 | 1 |
| 24. Placing patients with acute respiratory distress syndrome in prone position                                         | 1 |
| 25. Protocols to manage sepsis                                                                                          | 1 |
| 26. Stress ulcer prophylaxis                                                                                            | 1 |
| 27. Type of dialysis prescribed (i.e., continuous renal replacement therapy vs. intermittent renal replacement therapy) | 1 |
| 28. Using ultrasound to guide central venous catheter insertion                                                         | 1 |

Priorities Considered and Selected by Network Committee

- |                                                            |   |
|------------------------------------------------------------|---|
| 1. Transition of patient care between providers within ICU | 8 |
| 2. Transition of patient from ICU to hospital ward         | 4 |
| 3. Physical and pharmacological restraints                 | 2 |
| 4. Daily sedation interruption                             | 1 |
| 5. Early mobilization                                      | 1 |
| 6. End-of-life care                                        | 1 |
| 7. Prescriptions of empiric broad spectrum antimicrobials  | 1 |
| 8. Strategies to preserve patient sleep                    | 1 |

\* 136 providers suggested an additional 175 priorities. 43 suggestions did not satisfy the inclusion for the study. Among those suggestions that did satisfy the study inclusion criteria, a total 55 unique priorities were identified, 19 of which were newly identified, 28 had been considered but not selected by the Network committee and 8 had been considered and selected by the Network committee.
