# Supplementary material for: Stakeholder Engagement to Identify Priorities for Improving the Quality and Value of Critical Care
Source: PubMed Central journal article supplement (PMC4619641; doi:10.1371/journal.pone.0140141), 2015-10-22
Supplement: pone.0140141.s005.pdf [file pone.0140141.s005.pdf]

**S5 Appendix. Provider Ratings of Priorities for Improvement According to Provider Characteristics\*†**

| Practice                                                                | Profession |    |    |               | Provider Experience |             |           | Institution Academic Status |              | Institution Location |          | Patient Population |           |
|-------------------------------------------------------------------------|------------|----|----|---------------|---------------------|-------------|-----------|-----------------------------|--------------|----------------------|----------|--------------------|-----------|
|                                                                         | MD         | RN | RT | Allied Health | <10 years           | 10-20 years | >20 years | Teaching                    | Non-teaching | Urban                | Regional | Adult              | Pediatric |
| End-of-life care                                                        | 8          | 8  | 8  | 8             | 8                   | 8           | 8         | 8                           | 8            | 8                    | 8        | 8                  | 8         |
| Early mobilization                                                      | 8          | 8  | 8  | 8             | 8                   | 8           | 8         | 8                           | 8            | 8                    | 8        | 8                  | 7         |
| Strategies to preserve patient sleep                                    | 7          | 8  | 8  | 7             | 8                   | 8           | 8         | 8                           | 8            | 8                    | 8        | 8                  | 7         |
| Establishing daily goals for patient care                               | 7          | 7  | 7  | 7             | 7                   | 7           | 7         | 7                           | 7            | 7                    | 7        | 7                  | 7         |
| Transition of patient care from ICU to hospital ward                    | 7          | 7  | 7  | 8             | 7                   | 7           | 8         | 7                           | 7            | 7                    | 7        | 7                  | 7         |
| Transition of patient care between providers within ICU                 | 7          | 7  | 7  | 7.5           | 7                   | 7           | 8         | 7                           | 7            | 7                    | 7        | 7                  | 7         |
| Daily sedation interruption                                             | 7          | 7  | 7  | 8             | 7                   | 7           | 7         | 7                           | 7            | 7                    | 8        | 7                  | 5.5       |
| Delirium screening & diagnosis                                          | 7          | 7  | 7  | 8             | 7                   | 7           | 8         | 7                           | 7            | 7                    | 7        | 7                  | 6         |
| Temperature control in patients after resuscitation from cardiac arrest | 6          | 7  | 7  | 7             | 7                   | 7           | 7         | 7                           | 7            | 7                    | 7        | 7                  | 7         |

|                                                  |     |   |   |   |   |   |   |   |   |   |   |   |   |
|--------------------------------------------------|-----|---|---|---|---|---|---|---|---|---|---|---|---|
| Duration of empiric antimicrobial prescriptions  | 7   | 6 | 6 | 7 | 6 | 6 | 7 | 7 | 6 | 6 | 7 | 6 | 7 |
| Physical and pharmacological restraints          | 5.5 | 7 | 7 | 6 | 6 | 6 | 7 | 6 | 7 | 6 | 6 | 6 | 7 |
| Patient and family participation in daily rounds | 6   | 6 | 6 | 7 | 6 | 6 | 7 | 6 | 6 | 6 | 6 | 6 | 7 |
| Routine blood tests                              | 6   | 6 | 5 | 5 | 6 | 6 | 6 | 6 | 6 | 6 | 5 | 6 | 6 |

\* Data presented as medians. Shaded cells represent priorities rated as necessary or supplementary by different provider groups

† Abbreviations: MD, physician; RN, nurse; RT, respiratory therapist
